# Supplementary material for: A new Proposal for the Interpretation of the Diagonal Compression Test on Masonry Wallettes: the Identification of Young’s Modulus, Poisson’s Ratio, and Modulus of Rigidity
Source: Preprints.org preprint supplement (doi:10.20944/preprints202312.1239.v2), 2023-12-25
Supplement: Supplementary file 1 [file supplementary]

**Table S1.** Explanation of the symbols used in Figure 1.

| **Symbols** | **Meaning** |
| --- | --- |
|  | The compressive load applied along one of the diagonals of the masonry wallette (diagonal compression load). |
|  | The angle between the direction of and the horizontal mortar joints (bed joints). |
| and | The axes of the local reference frame of origin , parallel to the mortar joints ( is parallel to the horizontal mortar joints—or bed joints—and is parallel to the vertical mortar joints—or head joints). |
|  | The normal stress acting—in the direction of the -axis—on the planes of the infinitesimal neighborhood of that are perpendicular to the -axis. |
|  | The normal stress acting—in the direction of the -axis—on the planes of the infinitesimal neighborhood of that are perpendicular to the -axis. |
| 1 | The shear stress—directed along the -axis—acting on the planes of the infinitesimal neighborhood of that are perpendicular to the -axis (the -index designates the unit normal vector to the coordinate plane on which the shear stress acts, the -index identifies the coordinate direction along which the shear stress acts). |

1 , the shear stress—directed along the -axis—acting on the planes of the infinitesimal neighborhood of that are perpendicular to the -axis, is equal to : .
